# Supplementary material for: Performance study of the anterior nasal AMP SARS-CoV-2 rapid antigen test in comparison with nasopharyngeal rRT-PCR
Source: PubMed Central journal article supplement (PMC9394671; doi:10.1099/acmi.0.000361), 2022-06-01
Supplement: acmi-4-361-s001.pdf [file acmi-4-361-s001.pdf]

## 1 Supplement

2 Table S1. Demographic and clinical data of patients.

3

|                                | All patients<br>n = 175 | COVID-19 ward<br>n = 78 | Pre-admittance<br>outpatient clinic<br>n = 97 | P value |
|--------------------------------|-------------------------|-------------------------|-----------------------------------------------|---------|
| Age, years                     | 65 (46 – 75)            | 72 (53 – 76)            | 58 (42 – 68)                                  | 0.001   |
| Sex, female/male (%)           | 99/76 (57/43)           | 40/38 (51/49)           | 59/38 (61/39)                                 | 0.21    |
| Symptoms*, n (%)               |                         |                         |                                               | < 0.001 |
| None                           | 128 (73)                | 31 (40)                 | 0                                             |         |
| Most common                    | 21 (12)                 | 21 (27)                 |                                               |         |
| Less common                    | 3 (2)                   | 3 (4)                   |                                               |         |
| Severe                         | 39 (22)                 | 39 (50)                 |                                               |         |
| Oxygen therapy, n (%)          | 40 (23)                 | 40 (45)                 | 0                                             | < 0.001 |
| Time since symptom onset, days | 14 (7 – 18)             | 14 (7 – 18)             | n.a.                                          | n.a.    |

4 Data are given as n (%) or median (25<sup>th</sup> – 75<sup>th</sup> percentiles)

5 \* Symptoms were grouped according to the WHO classification (1) in common (fever, dry cough,  
6 fatigue), less common (sore throat, diarrhea, headache or other aches/pains, conjunctivitis, anosmia  
7 or ageusia, skin rash, discoloration of fingers or toes) and severe (dyspnea, chest pain, focal  
8 neurological deficit). These were counted separately, as a combination of symptoms from different  
9 groups is possible.

10 n.a.: non-applicable as all patients screened at the pre-admittance outpatient clinic were asymptomatic

11

12 **Reference**

13 1. WHO. Coronavirus, Symptoms 2021 [Available from:  
14 [https://www.who.int/health-topics/coronavirus#tab=tab\\_3](https://www.who.int/health-topics/coronavirus#tab=tab_3).  
15
